# Supplementary material
Source: Springer Nature journal article supplement (https://www.springermedizin.de/resource/supplementary/12950_2010_169_MOESM5_ESM.pdf/9558120)

## MSC Decrease IFN- $\gamma$ in the BAL

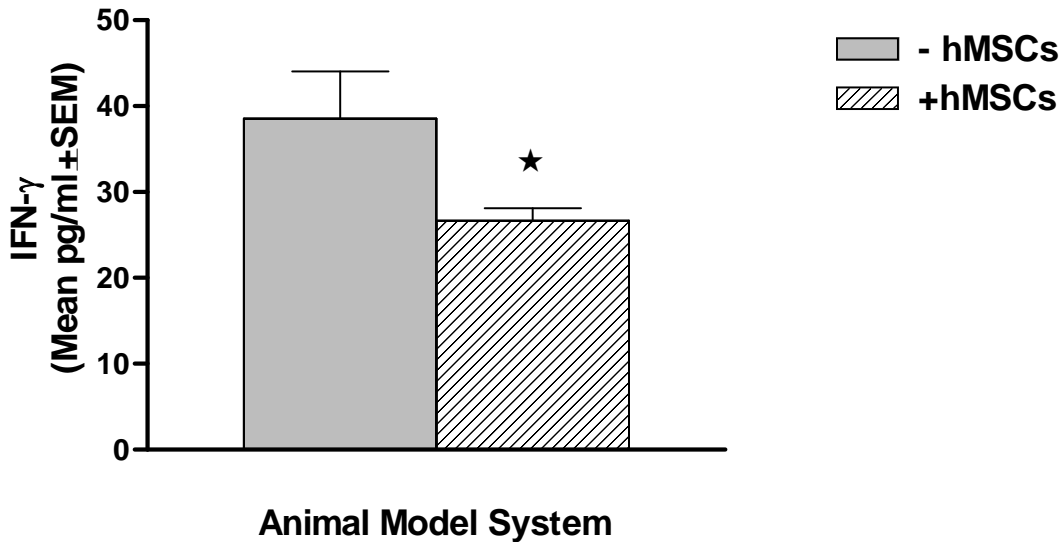

Supplement: MOESM5 [file 9558120]
